# Supplementary material for: Non-invasive characterization of the adipogenic differentiation of human bone marrow-derived mesenchymal stromal cells by HS-SPME/GC-MS
Source: PubMed Central journal article supplement — Sci Rep. 2014 Oct 9;4:6550. doi: 10.1038/srep06550 (PMC4190506; doi:10.1038/srep06550), 2014-10-09
Supplement: srep06550-s1.pdf [file srep06550-s1.pdf]

1 **Non-invasive characterization of the adipogenic differentiation of**  
2 **human bone marrow-derived mesenchymal stem cells by HS-**  
3 **SPME/GC-MS**

4  
5 Dong-Kyu Lee<sup>1,¶</sup> · TacGhee Yi<sup>2,¶</sup> · Kyung-Eun Park<sup>1</sup> · Hyun-Joo Lee<sup>3</sup> · Yun-Kyoung Cho<sup>2</sup> ·  
6 Seul Ji Lee<sup>1</sup> · Jeongmi Lee<sup>4</sup> · Jeong Hill Park<sup>1</sup> · Mi-Young Lee<sup>5</sup> · Sun U. Song<sup>2,\*</sup> · Sung Won  
7 Kwon<sup>1,\*</sup>  
8  
9

10 <sup>1</sup> College of Pharmacy and Research Institute of Pharmaceutical Sciences, Seoul National  
11 University, Seoul 151-742, Republic of Korea  
12

13 <sup>2</sup> Translational Research Center and Inha Research Institute for Medical Sciences, Inha  
14 University School of Medicine, Incheon 400-712, Republic of Korea  
15

16 <sup>3</sup> Drug Development Program, Department of Medicine, Inha University School of Medicine,  
17 Incheon, Republic of Korea  
18

19 <sup>4</sup> School of Pharmacy, Sungkyunkwan University, Suwon 440-746, Republic of Korea  
20

21 <sup>5</sup> Occupational Safety and Health Research Institute, Korea Occupational Safety and Health  
22 Agency  
23 Incheon 403-711, Republic of Korea  
24

25 \* Correspondences: swkwon@snu.ac.kr, sunuksong@inha.ac.kr  
26

27 ¶ These authors contributed equally to this work.  
28

29 **Supplementary Figure S1** Chromatograms in scan mode (A) and SIM mode (B) for the  
30 analyzed hMSCs. There were the other VOCs observed when using scan mode, but only  
31 FAMEs were detected in SIM mode.

32

33

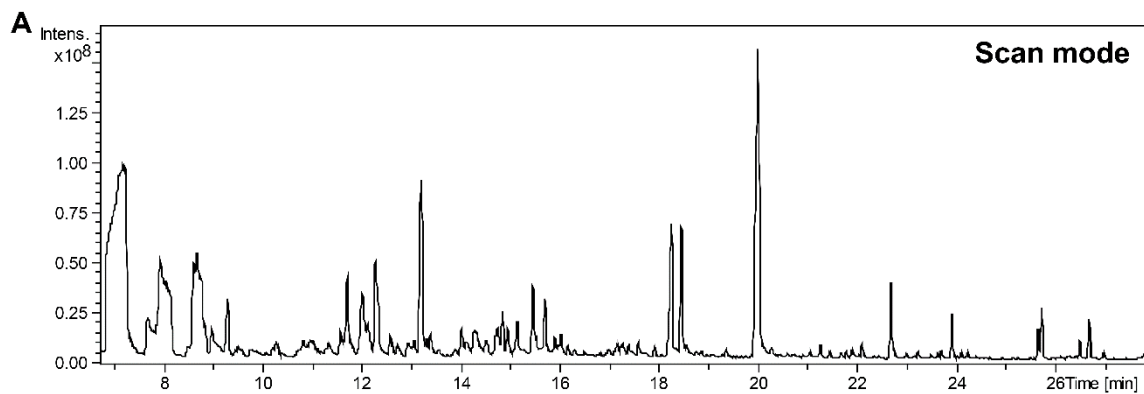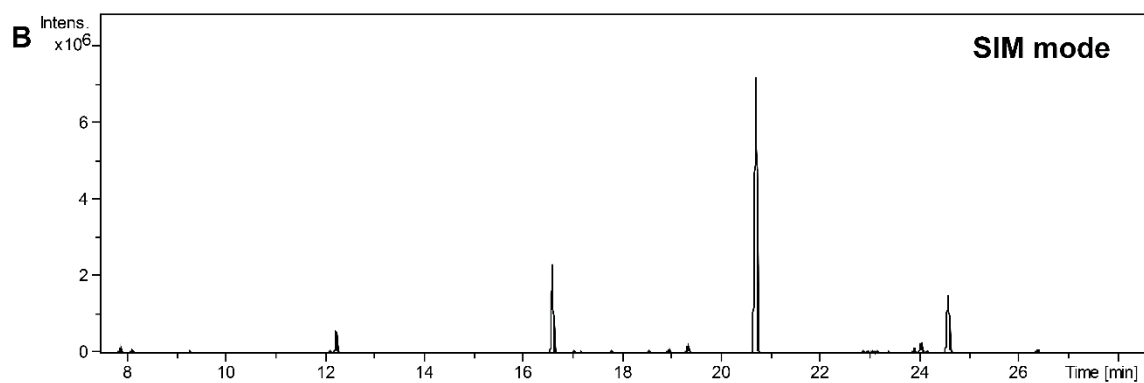

34

35

36 **Supplementary Figure S2** Optimization of extraction time of 7 FAMEs using PDMS/DVB fiber

37

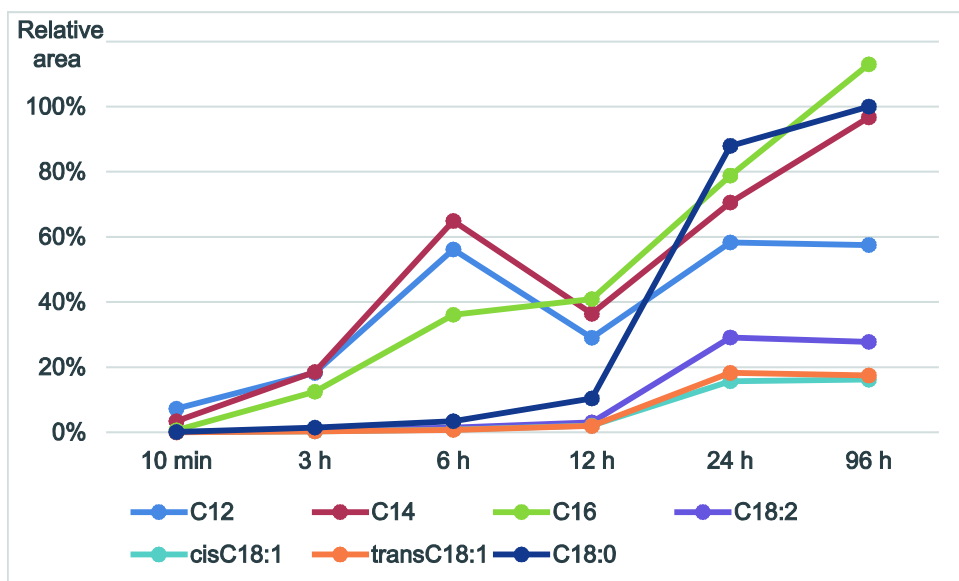

38

39 **Supplementary Table S1** Assigned VOCs from adipogenic medium (blank medium of adipogenic cell) and growth medium (blank medium of  
 40 MSCs)

| Retention time (min) | Compound name                                                  | Molecular weight | Formula                                        | Similarity index | Adipogenic medium | Growth medium |
|----------------------|----------------------------------------------------------------|------------------|------------------------------------------------|------------------|-------------------|---------------|
| 4.76                 | Spiro[2.4]hepta-4,6-diene                                      | 92               | C <sub>7</sub> H <sub>8</sub>                  | 95               | 0                 | 0             |
| 6.53                 | Dimethylsulfoxonium formylmethylide                            | 120              | C <sub>4</sub> H <sub>8</sub> O <sub>2</sub> S | 95               | 0                 |               |
| 6.86                 | 2,4-Dimethyl-1-heptene                                         | 126              | C <sub>9</sub> H <sub>18</sub>                 | 89               |                   | 0             |
| 7.43                 | Ethylbenzene                                                   | 106              | C <sub>8</sub> H <sub>10</sub>                 | 94               | 0                 | 0             |
| 7.68                 | Benzene, 1,3-dimethyl-                                         | 106              | C <sub>8</sub> H <sub>10</sub>                 | 97               | 0                 | 0             |
| 8.11                 | Cyclohexanol                                                   | 100              | C <sub>6</sub> H <sub>12</sub> O               | 95               |                   | 0             |
| 8.33                 | Styrene                                                        | 104              | C <sub>8</sub> H <sub>8</sub>                  | 92               |                   | 0             |
| 8.41                 | Benzene, 1,2-dimethyl-                                         | 106              | C <sub>8</sub> H <sub>10</sub>                 | 96               | 0                 | 0             |
| 10.50                | Benzaldehyde                                                   | 106              | C <sub>7</sub> H <sub>6</sub> O                | 92               | 0                 | 0             |
| 11.26                | Phosphonic acid, (p-hydroxyphenyl)-                            | 174              | C <sub>6</sub> H <sub>7</sub> O <sub>4</sub> P | 93               | 0                 | 0             |
| 11.66                | Benzene, 1-ethenyl-3-methyl-                                   | 118              | C <sub>9</sub> H <sub>10</sub>                 | 94               | 0                 | 0             |
| 11.76                | Benzene, 1,1'-(1-ethenyl-1,3-propanediyl)bis-                  | 222              | C <sub>17</sub> H <sub>18</sub>                | 93               | 0                 | 0             |
| 11.91                | Octane, 2,5-dimethyl-                                          | 142              | C <sub>10</sub> H <sub>22</sub>                | 88               |                   | 0             |
| 12.69                | Decane, 2,2-dimethyl-                                          | 170              | C <sub>12</sub> H <sub>26</sub>                | 92               | 0                 | 0             |
| 12.78                | 2-Propyl-1-pentanol                                            | 130              | C <sub>8</sub> H <sub>18</sub> O               | 94               | 0                 | 0             |
| 13.00                | Nonane, 3-methyl-5-propyl-                                     | 184              | C <sub>13</sub> H <sub>28</sub>                | 90               | 0                 | 0             |
| 13.62                | Octane, 2,6-dimethyl-                                          | 142              | C <sub>10</sub> H <sub>22</sub>                | 89               | 0                 |               |
| 13.84                | Acetophenone                                                   | 120              | C <sub>8</sub> H <sub>8</sub> O                | 89               | 0                 | 0             |
| 13.91                | Undecane, 2,5-dimethyl-                                        | 184              | C <sub>13</sub> H <sub>28</sub>                | 82               | 0                 | 0             |
| 14.30                | Benzaldehyde, 4-methyl-                                        | 120              | C <sub>8</sub> H <sub>8</sub> O                | 85               | 0                 |               |
| 14.47                | Benzenemethanol, .alpha.-methyl-.alpha.-(1-methyl-2-propenyl)- | 176              | C <sub>12</sub> H <sub>16</sub> O              | 84               |                   | 0             |

|       |                                                                                 |     |                   |    |   |   |
|-------|---------------------------------------------------------------------------------|-----|-------------------|----|---|---|
| 15.01 | Undecane                                                                        | 156 | $C_{11}H_{24}$    | 84 | 0 | 0 |
| 15.07 | Nonanal                                                                         | 142 | $C_9H_{18}O$      | 93 | 0 |   |
| 15.21 | Maltol                                                                          | 126 | $C_6H_6O_3$       | 94 | 0 | 0 |
| 17.22 | Benzeneacetic acid, methyl ester                                                | 150 | $C_9H_{10}O_2$    | 91 | 0 |   |
| 17.72 | Methyl salicylate                                                               | 152 | $C_8H_8O_3$       | 94 | 0 |   |
| 17.94 | Dodecane                                                                        | 170 | $C_{12}H_{26}$    | 97 | 0 | 0 |
| 18.05 | Decanal                                                                         | 156 | $C_{10}H_{20}O$   | 92 | 0 | 0 |
| 18.76 | 2-Propenoic acid, 2-ethylhexyl ester                                            | 184 | $C_{11}H_{20}O_2$ | 89 | 0 |   |
| 19.44 | Benzene, 1,3-bis(1,1-dimethylethyl)-                                            | 190 | $C_{14}H_{22}$    | 85 |   | 0 |
| 19.88 | 1-Dodecanol                                                                     | 186 | $C_{12}H_{26}O$   | 89 |   | 0 |
| 20.17 | Nonane, 5-methyl-5-propyl-                                                      | 184 | $C_{13}H_{28}$    | 90 | 0 | 0 |
| 20.67 | Decane, 5-propyl-                                                               | 184 | $C_{13}H_{28}$    | 89 | 0 | 0 |
| 21.43 | Ethyl-4-chlorobenzoate                                                          | 184 | $C_9H_9ClO_2$     | 88 | 0 |   |
| 22.07 | Propanoic acid, 2-methyl-, 2,2-dimethyl-1-(2-hydroxy-1-methylethyl)propyl ester | 216 | $C_{12}H_{24}O_3$ | 90 | 0 |   |
| 22.09 | Tridecane, 5-methyl-                                                            | 198 | $C_{14}H_{30}$    | 88 |   | 0 |
| 22.36 | 2,4,4,6,6,8,8-Heptamethyl-2-nonene                                              | 224 | $C_{16}H_{32}$    | 87 | 0 | 0 |
| 22.51 | 2-Bromo dodecane                                                                | 248 | $C_{12}H_{25}Br$  | 89 |   | 0 |
| 22.59 | Propanoic acid, 2-methyl-, 3-hydroxy-2,4,4-trimethylpentyl ester                | 216 | $C_{12}H_{24}O_3$ | 90 | 0 | 0 |
| 23.05 | 1-Tetradecene                                                                   | 196 | $C_{14}H_{28}$    | 96 | 0 | 0 |
| 23.27 | Tetradecane                                                                     | 198 | $C_{14}H_{30}$    | 92 | 0 | 0 |
| 24.00 | Ethanone, 1,1'-(1,4-phenylene)bis-                                              | 162 | $C_{10}H_{10}O_2$ | 94 | 0 | 0 |
| 24.81 | Tetradecane, 2-methyl-                                                          | 212 | $C_{15}H_{32}$    | 89 | 0 | 0 |
| 24.95 | 2,6-Di-tert-butyl-1,4-benzoquinone                                              | 220 | $C_{14}H_{20}O_2$ | 91 | 0 |   |
| 25.41 | 3-Buten-2-one, 4-(2,6,6-trimethyl-1-cyclohexen-1-yl)-                           | 192 | $C_{13}H_{20}O$   | 92 | 0 | 0 |

|       |                                                         |     |                                                  |    |   |   |
|-------|---------------------------------------------------------|-----|--------------------------------------------------|----|---|---|
| 25.63 | Hexadecane, 7,9-dimethyl-                               | 254 | C <sub>18</sub> H <sub>38</sub>                  | 89 | 0 | 0 |
| 25.69 | Pentadecane                                             | 212 | C <sub>15</sub> H <sub>32</sub>                  | 95 | 0 | 0 |
| 25.95 | Phenol, 2,4-bis(1,1-dimethylethyl)-                     | 206 | C <sub>14</sub> H <sub>22</sub> O                | 90 | 0 |   |
| 26.26 | Methyl laurate                                          | 214 | C <sub>13</sub> H <sub>26</sub> O <sub>2</sub>   | 92 | 0 | 0 |
| 27.84 | Diethyl Phthalate                                       | 222 | C <sub>12</sub> H <sub>14</sub> O <sub>4</sub>   | 94 |   | 0 |
| 27.82 | n-Pentadecanol                                          | 228 | C <sub>15</sub> H <sub>32</sub> O                | 92 | 0 |   |
| 27.99 | Hexadecane                                              | 226 | C <sub>16</sub> H <sub>34</sub>                  | 94 |   | 0 |
| 28.25 | Tetradecanal                                            | 212 | C <sub>14</sub> H <sub>28</sub> O                | 96 | 0 | 0 |
| 28.64 | Benzophenone                                            | 182 | C <sub>13</sub> H <sub>10</sub> O                | 91 | 0 | 0 |
| 28.87 | Phenol, 2,6-bis(1,1-dimethylethyl)-4-(1-methylpropyl)-  | 262 | C <sub>18</sub> H <sub>30</sub> O                | 88 | 0 | 0 |
| 29.38 | 2-Bromotetradecane                                      | 276 | C <sub>14</sub> H <sub>29</sub> Br               | 83 | 0 | 0 |
| 29.86 | Bis(2-ethylhexyl) methylphosphonate                     | 320 | C <sub>17</sub> H <sub>37</sub> O <sub>3</sub> P | 85 |   | 0 |
| 29.97 | Phenol, 2,4-di-t-butyl-6-nitro-                         | 251 | C <sub>14</sub> H <sub>21</sub> NO <sub>3</sub>  | 90 | 0 | 0 |
| 30.17 | Heptadecane                                             | 240 | C <sub>17</sub> H <sub>36</sub>                  | 94 | 0 | 0 |
| 30.67 | Methyl myristate                                        | 240 | C <sub>15</sub> H <sub>30</sub> O <sub>2</sub>   | 92 | 0 | 0 |
| 32.24 | Octadecane                                              | 254 | C <sub>18</sub> H <sub>38</sub>                  | 94 | 0 |   |
| 32.56 | Pentadecanal-                                           | 226 | C <sub>15</sub> H <sub>30</sub> O                | 95 |   | 0 |
| 32.74 | Pentadecanoic acid, methyl ester                        | 256 | C <sub>16</sub> H <sub>32</sub> O <sub>2</sub>   | 85 | 0 | 0 |
| 34.30 | Methyl palmitoleate                                     | 268 | C <sub>17</sub> H <sub>32</sub> O <sub>2</sub>   | 95 | 0 | 0 |
| 34.32 | 1-Hexadecanamine, N,N-dimethyl-                         | 269 | C <sub>18</sub> H <sub>39</sub> N                | 92 |   | 0 |
| 34.60 | 5,9,13-Pentadecatrien-2-one, 6,10,14-trimethyl-, (E,E)- | 262 | C <sub>18</sub> H <sub>30</sub> O                | 86 |   | 0 |
| 34.72 | Methyl palmitate                                        | 270 | C <sub>17</sub> H <sub>34</sub> O <sub>2</sub>   | 88 | 0 | 0 |
| 35.32 | n-Hexadecanoic acid                                     | 214 | C <sub>13</sub> H <sub>26</sub> O <sub>2</sub>   | 84 |   | 0 |
| 35.35 | Pentadecanoic acid                                      | 242 | C <sub>15</sub> H <sub>30</sub> O <sub>2</sub>   | 91 | 0 |   |
| 37.81 | Methyl linoleate                                        | 294 | C <sub>19</sub> H <sub>34</sub> O <sub>2</sub>   | 94 | 0 | 0 |
| 37.92 | Methyl oleate                                           | 296 | C <sub>19</sub> H <sub>36</sub> O <sub>2</sub>   | 94 | 0 | 0 |

|       |                                       |     |                   |    |   |   |
|-------|---------------------------------------|-----|-------------------|----|---|---|
| 38.03 | Methyl elaidate                       | 296 | $C_{19}H_{36}O_2$ | 93 | o |   |
| 38.38 | Methyl stearate                       | 298 | $C_{19}H_{38}O_2$ | 95 | o | o |
| 39.18 | Phenol, 4,4'-(1-methylethylidene)bis- | 228 | $C_{15}H_{16}O_2$ | 92 | o |   |

41

42

43 **Supplementary Table S2** VOCs released from the adipogenic differentiated MSCs (relatively  
 44 high quantity on the cells compared to blank medium)

| Retention time (min) | Compound name                              | Molecular weight | Formula                                        | Similarity index |
|----------------------|--------------------------------------------|------------------|------------------------------------------------|------------------|
| 25.69                | heptadecane                                | 240              | C <sub>17</sub> H <sub>36</sub>                | 95               |
| 26.25                | Methyl laurate                             | 214              | C <sub>13</sub> H <sub>26</sub> O <sub>2</sub> | 92               |
| 29.86                | Cyclopentadecanone                         | 224              | C <sub>15</sub> H <sub>28</sub> O              | 86               |
| 30.12                | 2-pentadecanone                            | 226              | C <sub>15</sub> H <sub>30</sub> O              | 96               |
| 30.67                | Methyl myristate                           | 240              | C <sub>15</sub> H <sub>30</sub> O <sub>2</sub> | 92               |
| 33.31                | Arachidonic acid                           | 304              | C <sub>20</sub> H <sub>32</sub> O <sub>2</sub> | 88               |
| 33.57                | Z-5,17-Octadecadien-1-ol acetate           | 308              | C <sub>20</sub> H <sub>36</sub> O <sub>2</sub> | 85               |
| 33.78                | Z-(13,14-Epoxy)tetradec-11-en-1-ol acetate | 268              | C <sub>16</sub> H <sub>28</sub> O <sub>3</sub> | 85               |
| 33.91                | 4-Octadecylmorpholine                      | 339              | C <sub>22</sub> H <sub>45</sub> NO             | 92               |
| 34.22                | 9-Hexadecenoic acid, methyl ester          | 268              | C <sub>17</sub> H <sub>32</sub> O <sub>2</sub> | 89               |
| 34.27                | 2-Nonadecanone                             | 282              | C <sub>19</sub> H <sub>38</sub> O              | 88               |
| 34.31                | Methyl palmitoleate                        | 268              | C <sub>17</sub> H <sub>32</sub> O <sub>2</sub> | 95               |
| 34.70                | Methyl palmitate                           | 270              | C <sub>17</sub> H <sub>34</sub> O <sub>2</sub> | 91               |
| 36.58                | Methyl margarate                           | 284              | C <sub>18</sub> H <sub>36</sub> O <sub>2</sub> | 95               |
| 37.27                | cis,cis,cis-7,10,13-Hexadecatrienal        | 234              | C <sub>16</sub> H <sub>26</sub> O              | 85               |
| 37.82                | Methyl linoleate                           | 294              | C <sub>19</sub> H <sub>34</sub> O <sub>2</sub> | 96               |
| 37.93                | Methyl oleate                              | 296              | C <sub>19</sub> H <sub>36</sub> O <sub>2</sub> | 92               |
| 38.03                | Methyl elaidate                            | 296              | C <sub>19</sub> H <sub>36</sub> O <sub>2</sub> | 93               |
| 38.41                | Methyl stearate                            | 298              | C <sub>19</sub> H <sub>38</sub> O <sub>2</sub> | 94               |
| 40.42                | cis-4,7,10,13,16,19-Docosahexanoic acid    | 328              | C <sub>22</sub> H <sub>32</sub> O <sub>2</sub> | 86               |
| 40.65                | Methyl arachidonate                        | 318              | C <sub>21</sub> H <sub>34</sub> O <sub>2</sub> | 91               |

45

46



47 **Supplementary Table S3** VOCs released from the non-differentiated MSCs (relatively high  
48 quantity on the cells compared to blank medium)

49

| <b>Retention time</b> | <b>Compound name</b>              | <b>Molecular weight</b> | <b>Formula</b>                                 | <b>Similarity index</b> |
|-----------------------|-----------------------------------|-------------------------|------------------------------------------------|-------------------------|
| 12.79                 | 1-Decene, 2,4-dimethyl-           | 168                     | C <sub>12</sub> H <sub>24</sub>                | 91 <sup>51</sup>        |
| 13.98                 | 2-Octen-1-ol                      | 128                     | C <sub>8</sub> H <sub>16</sub> O               | 93                      |
| 14.07                 | 1-Octanol                         | 130                     | C <sub>8</sub> H <sub>18</sub> O               | 89 <sup>52</sup>        |
| 20.01                 | (3Z)-3-Octenyl acetate            | 170                     | C <sub>10</sub> H <sub>18</sub> O <sub>2</sub> | 84 <sup>53</sup>        |
| 20.13                 | (2E)-2-Decenyl acetate            | 198                     | C <sub>12</sub> H <sub>22</sub> O <sub>2</sub> | 85                      |
| 22.24                 | 3-Cyclohexene-1-ethanol           | 126                     | C <sub>8</sub> H <sub>14</sub> O               | 85 <sup>54</sup>        |
| 22.73                 | 2-Ethyl-1,6-dioxaspiro[4.4]nonane | 156                     | C <sub>9</sub> H <sub>16</sub> O <sub>2</sub>  | 86 <sup>55</sup>        |
| 30.13                 | 2-Pentadecanone                   | 226                     | C <sub>15</sub> H <sub>30</sub> O              | 94 <sup>56</sup>        |

57

58 **Full-length blots for Figure 3D**

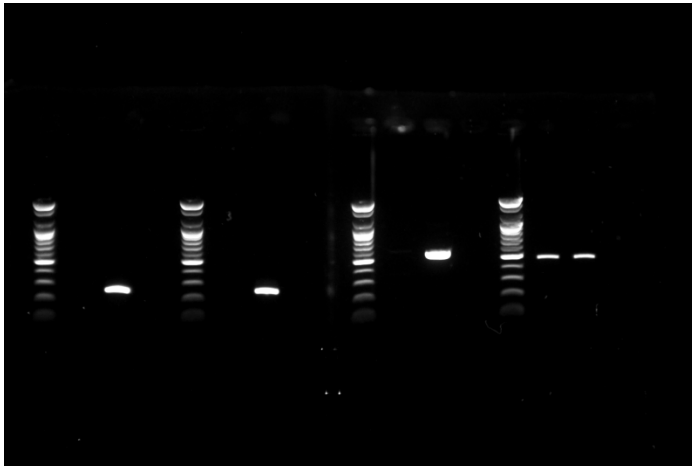

59

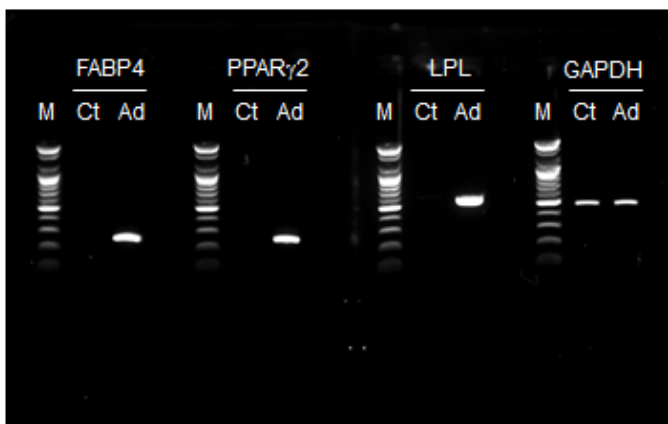

60

61 Regarding Figure 3D, we found original RNA samples and performed re-analysis including  
62 cDNA synthesis, RT-PCR and electrophoresis. Our results were reproducible when RT-PCR  
63 figure was compared with previous one. Old Figure 3D was replaced with new Figure 3D as  
64 follows.

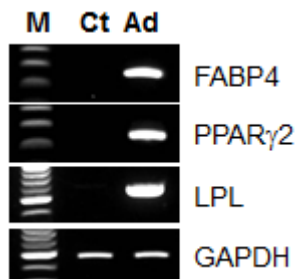

65

66

67 Regarding Figure 1C, we could not find RNA as well as full-length blots.
